# Supplementary material for: A binuclear cadmium(ii) hydroxide complex and its CO2 reaction product
Source: Royal Society of Chemistry journal article supplement (doi:10.1039/b109883g), 2002-01-01
Supplement: b109883g.doc [file b109883g.doc]

**Supplementary Material (ESI) for Dalton Transactions**

**This journal is © The Royal Society of Chemistry 2002**

A binuclear cadmium(II) hydroxide complex and its CO2 reaction product

Russell A. Allred,† Atta M. Arif‡ and Lisa M. Berreau*†

†Department of Chemistry and Biochemistry, Utah State University, 0300 Old Main Hill, Logan, UT 84322-0300.

‡Department of Chemistry, University of Utah, 315 S. 1400 E., Salt Lake City, Utah 84112

*Corresponding author. FAX: (435) 797-3390; email: [berreau@cc.usu.edu](mailto:berreau@cc.usu.edu)

**Experimental Procedures.**

**Synthesis and Characterization of Complexes.**

**Safety note.** *Caution!* Perchlorate salts of metal complexes with organic ligands are potentially explosive. Only a small amount of material should be prepared and these should be handled with great care.

**[(bmnpaCd)2(-OH)2](ClO4)2·CH3CN (1):** A solution of bmnpa (0.15 g, 0.46 mmol) in CH3CN (3 mL) was added to solid Cd(ClO4)2·5H2O (0.18 g, 0.44 mmol). The resulting clear, colorless solution was stirred for 15 minutes and then transferred to a vial containing NMe4OH·5H2O (0.082 g, 0.44 mmol). After stirring the resultant slurry for 3 hours at room temperature, the solvent was removed *in vacuo*. The solid residue was redissolved in CH2Cl2 (4 mL) and filtered through a celite/glass wool plug. To the filtrate was added excess Et2O (20 mL) and the resultant cloudy solution was cooled to –12(1) C for 24 hours. Recrystallization of the precipitated solid by Et2O diffusion into a CH3CN solution resulted in clear, colorless needle-type crystals (0.21 g, 79%). 1H NMR (CD3CN, 270 MHz): 8.81 (t, *J* =6.5 Hz, 1H, N-*H*), 7.51 (t, *J =* 8.0 Hz, 1H), 6.52 (d, *J =* 8.0 Hz, 2H), 3.85 (s, 2H), 3.01-2.68 (m, 8H), 2.15 (d, *J =* 6.5 Hz, 2H), 2.14 (s, 6H), 1.49 (br, 1H, O-*H*), 0.71 (s, 9H); 13C{1H} NMR (CD3CN, 67.9 MHz)  160.6, 151.5, 140.5, 111.6, 106.4, 60.4, 53.1, 50.0, 32.4, 31.6, 26.7, 14.4; 113Cd NMR (CD3CN, 88.8 MHz):  304; FTIR (KBr, cm-1): 3587 (m, O-H), 3232 (m, N-H). Anal Calcd. for C36H67N7S4Cl2O10Cd2: C, 36.58; H, 5.71; N, 8.30. Found: C, 36.50; N, 5.86; N, 7.88.

**Treatment of 1 with CO2. Isolation of [(bmnpaCd)2(-CO3)](ClO4)2·CH3CN (2):** A CH3CN (2 mL) solution of **1** (0.066 g, 0.056 mmol) was stirred vigorously under a flow of CO2 gas for one minute. Diffusion of Et2O into this solution at room temperature, under a CO2 atomosphere, yielded clear crystals (0.069 g, 99%). 1H NMR (CD3CN, 270 MHz):  7.92 (br, 1H, N-*H*), 7.62 (t, *J* = 7.8 Hz, 1H), 6.67 (d, *J* = 8.6 Hz, 1H), 6.58 (d, *J* = 6.9 Hz, 1H), 3.78 (br s), 3.12-2.67 (m, 10H), 2.10 (s, 6H), 1.02 (s, 9H); 13C{1H} NMR (CD3CN, 67.9 MHz):  169.6, 160.4, 151.8, 141.0, 112.7, 106.8, 58.2 54.5, 49.2, 32.3, 30.5, 27.1, 14.2; 113Cd NMR (CD3CN, 88.8 MHz):  245; FTIR (KBr, cm-1): 3264 (br, N-H). Anal Calcd. for C37H65N7O11S4Cl2Cd2: C, 36.79; H, 5.42; N, 8.12. Found: C, 37.20; H, 5.46; N, 8.21.
